# Supplementary material for: A Use of Tritium-Labeled Peat Fulvic Acids and Polyphenolic Derivatives for Designing Pharmacokinetic Experiments on Mice
Source: MDPI journal article supplement (doi:10.3390/biomedicines9121787), 2021-11-29
Supplement: s1 [file s1]

## Supplementary Materials

Table S1. Tissue content of [<sup>3</sup>H]-FA-Vi18 after intravenous injection or by gavage of 10 mg/kg to female BALB/C mice (M±SEM, n=3)

| A. Tissue content after intravenous injection (mg/kg) |                           |            |            |            |            |           |
|-------------------------------------------------------|---------------------------|------------|------------|------------|------------|-----------|
| Sample                                                | Time after administration |            |            |            |            |           |
|                                                       | 5 min                     | 30 min     | 1 h        | 2 h        | 6 h        | 24 h      |
| Blood                                                 | 14,12±1,34                | 4,21±1,44  | 2,91±0,48  | 1,78±0,77  | 0,85±0,72  | 0,41±0,38 |
| Liver                                                 | 9,65±0,96                 | 4,26±0,28  | 3,15±0,36  | 2,29±0,12  | 1,56±0,10  | 1,54±0,07 |
| Kidneys                                               | 28,53±1,34                | 12,28±1,44 | 10,67±0,48 | 11,05±0,77 | 11,15±0,72 | 8,43±0,38 |
| Brain                                                 | 0,69±0,03                 | 0,51±0,02  | 0,52±0,04  | 0,46±0,02  | 0,41±0,03  | 0,33±0,01 |
| Spleen                                                | 3,60±0,22                 | 1,49±0,17  | 1,34±0,10  | 1,19±0,05  | 0,97±0,10  | 0,79±0,06 |
| Thymus                                                | 2,57±0,17                 | 1,02±0,02  | 0,70±0,04  | 0,81±0,09  | 0,49±0,03  | 0,30±0,04 |
| Ovaries                                               | 4,14±1,34                 | 1,14±1,44  | 0,94±0,48  | 0,73±0,77  | 0,54±0,72  | 0,30±0,38 |
| Heart                                                 | 6,06±0,38                 | 2,00±0,17  | 1,49±0,11  | 1,04±0,03  | 0,70±0,05  | 0,44±0,02 |
| B. Tissue content after oral administration (mg/kg)   |                           |            |            |            |            |           |
| Sample                                                | Time after administration |            |            |            |            |           |
|                                                       | 30 min                    | 1 h        | 2 h        | 6 h        | 24 h       | 48 h      |
| Blood                                                 | 1,99±4,67                 | 0,51±0,09  | 0,61±0,07  | 0,53±0,09  | 0,32±0,01  | 0,26±0,05 |
| Liver                                                 | 2,02±1,29                 | 0,94±0,11  | 0,77±0,02  | 0,62±0,06  | 0,49±0,14  | 0,32±0,03 |
| Kidneys                                               | 5,60±4,67                 | 1,11±0,09  | 0,85±0,07  | 0,71±0,09  | 0,40±0,01  | 0,39±0,05 |
| Brain                                                 | 0,35±0,08                 | 0,37±0,04  | 0,51±0,05  | 0,43±0,02  | 0,29±0,01  | 0,26±0,01 |
| Spleen                                                | 0,64±0,36                 | 0,43±0,05  | 0,51±0,02  | 0,47±0,03  | 0,30±0,01  | 0,30±0,04 |
| Thymus                                                | 0,30±0,04                 | 1,37±1,04  | 0,38±0,03  | 0,34±0,04  | 0,35±0,02  | 0,22±0,01 |
| Ovaries                                               | 0,34±4,67                 | 0,07±0,09  | 0,04±0,07  | 0,03±0,09  | 0,03±0,01  | 0,05±0,05 |
| Heart                                                 | 0,86±0,58                 | 0,36±0,01  | 0,36±0,05  | 0,39±0,02  | 0,21±0,02  | 0,27±0,04 |

Table S2. Tissue content of [<sup>3</sup>H]-BP-Cx-1 after intravenous injection or by gavage of 100 mg/kg to female BALB/C mice (M±SEM, n=3)

| A. Tissue content after intravenous injection (mg/kg) |                           |             |             |             |             |             |
|-------------------------------------------------------|---------------------------|-------------|-------------|-------------|-------------|-------------|
| Sample                                                | Time after administration |             |             |             |             |             |
|                                                       | 5 min                     | 30 min      | 1 h         | 2 h         | 6 h         | 12 h        |
| Blood                                                 | 25,6±5,9                  | 32,3±2,9    | 91,3±5,8    | 72,5±2,9    | 155,2±16,7  | 85,9±17,8   |
| Liver                                                 | 396,7±26,0                | 366,7±17,6  | 230,0±60,3  | 253,3±31,8  | 220,0±25,2  | 170,0±11,6  |
| Kidneys                                               | 233,3±29,6                | 206,7±8,8   | 180,0±100,2 | 343,3±98,2  | 226,7±33,3  | 293,3±32,83 |
| Brain                                                 | 3,9±0,4                   | 3,7±0,0     | 5,9±0,4     | 4,9±0,3     | 6,3±0,5     | 4,9±0,50    |
| Spleen                                                | 233,3±52,4                | 153,3±8,8   | 80,0±25,2   | 73,3±8,8    | 46,7±8,8    | 56,7±8,8    |
| Thymus                                                | 23,5±2,7                  | 16,1±0,8    | 28,2±1,1    | 23,9±3,6    | 25,6±1,6    | 27,2±6,7    |
| Ovaries                                               | 42,0±1,7                  | 40,7±4,7    | 63,0±1,2    | 63,7±0,7    | 47,7±4,8    | 115,7±26,7  |
| Heart                                                 | 5,4±0,4                   | 5,3±1,2     | 3,9±0,8     | 5,3±0,4     | 4,2±0,7     | 4,2±0,9     |
| B. Tissue content after oral administration (mg/kg)   |                           |             |             |             |             |             |
| Sample                                                | Time after administration |             |             |             |             |             |
|                                                       | 30 min                    | 1 h         | 2 h         | 6 h         | 24 h        | 48 h        |
| Blood                                                 | 1,50±0,10                 | 1,63±0,26   | 2,70±1,86   | 1,87±0,17   | 1,33±0,41   | 1,33±0,34   |
| Liver                                                 | 2,10±0,17                 | 3,37±0,52   | 16,13±12,87 | 5,80±0,20   | 4,67±1,39   | 5,73±1,82   |
| Kidneys                                               | 2,50±0,15                 | 2,53±0,22   | 17,73±15,39 | 4,60±0,46   | 3,83±0,73   | 4,00±1,08   |
| Brain                                                 | 2,10±0,10                 | 1,93±0,24   | 1,30±0,32   | 1,73±0,23   | 1,07±0,26   | 0,97±0,22   |
| Spleen                                                | 1,97±0,12                 | 2,00±0,21   | 4,33±3,19   | 1,87±0,24   | 1,27±0,32   | 1,20±0,35   |
| Thymus                                                | 1,73±0,19                 | 1,77±0,26   | 7,33±6,39   | 1,83±0,29   | 1,13±0,27   | 0,93±0,28   |
| Ovaries                                               | 0,47±0,32                 | 0,58±0,19   | 1,03±0,83   | 1,17±0,12   | 0,53±0,23   | 0,77±0,22   |
| Heart                                                 | 0,008±0,002               | 0,045±0,025 | 0,160±0,145 | 0,077±0,027 | 0,041±0,023 | 0,060±0,023 |
